# Supplementary material for: Synthesis of organochalcogens stabilized by intramolecular non-bonded interactions of sterically unhindered 2-phenyl-2-oxazolineElectronic supplementary information (ESI) available: 77Se NMR spectrum of 14, molecular structure of 16 and packing diagram of 15. See http://www.rsc.org/suppdata/nj/b3/b312364b/
Source: Royal Society of Chemistry journal article supplement (doi:10.1039/b312364b), 2004-01-01
Supplement: b312364b.doc [file b312364b.doc]

**Synthesis of organochalcogens stabilized by intramolecular nonbonded interaction of sterically non-hindered 2-phenyl-2-oxazoline**

**Sangit Kumar,a Karuppasamy Kandasamy,a Harkesh B. Singh,a,* and Ray J. Butcherb**

*aDepartment of Chemistry, Indian Institute of Technology, Bombay, Powai, Mumbai 400 076, India*

*bDepartment of Chemistry, Howard University, Washington DC 20059, USA*

chhbsia@chem.iitb.ac.in

===========================================

S U P P L E M E N T A R Y M A T E R I A L

===========================================

B E L O N G I N G TO T H E P A P E R

New Journal of Chemistry


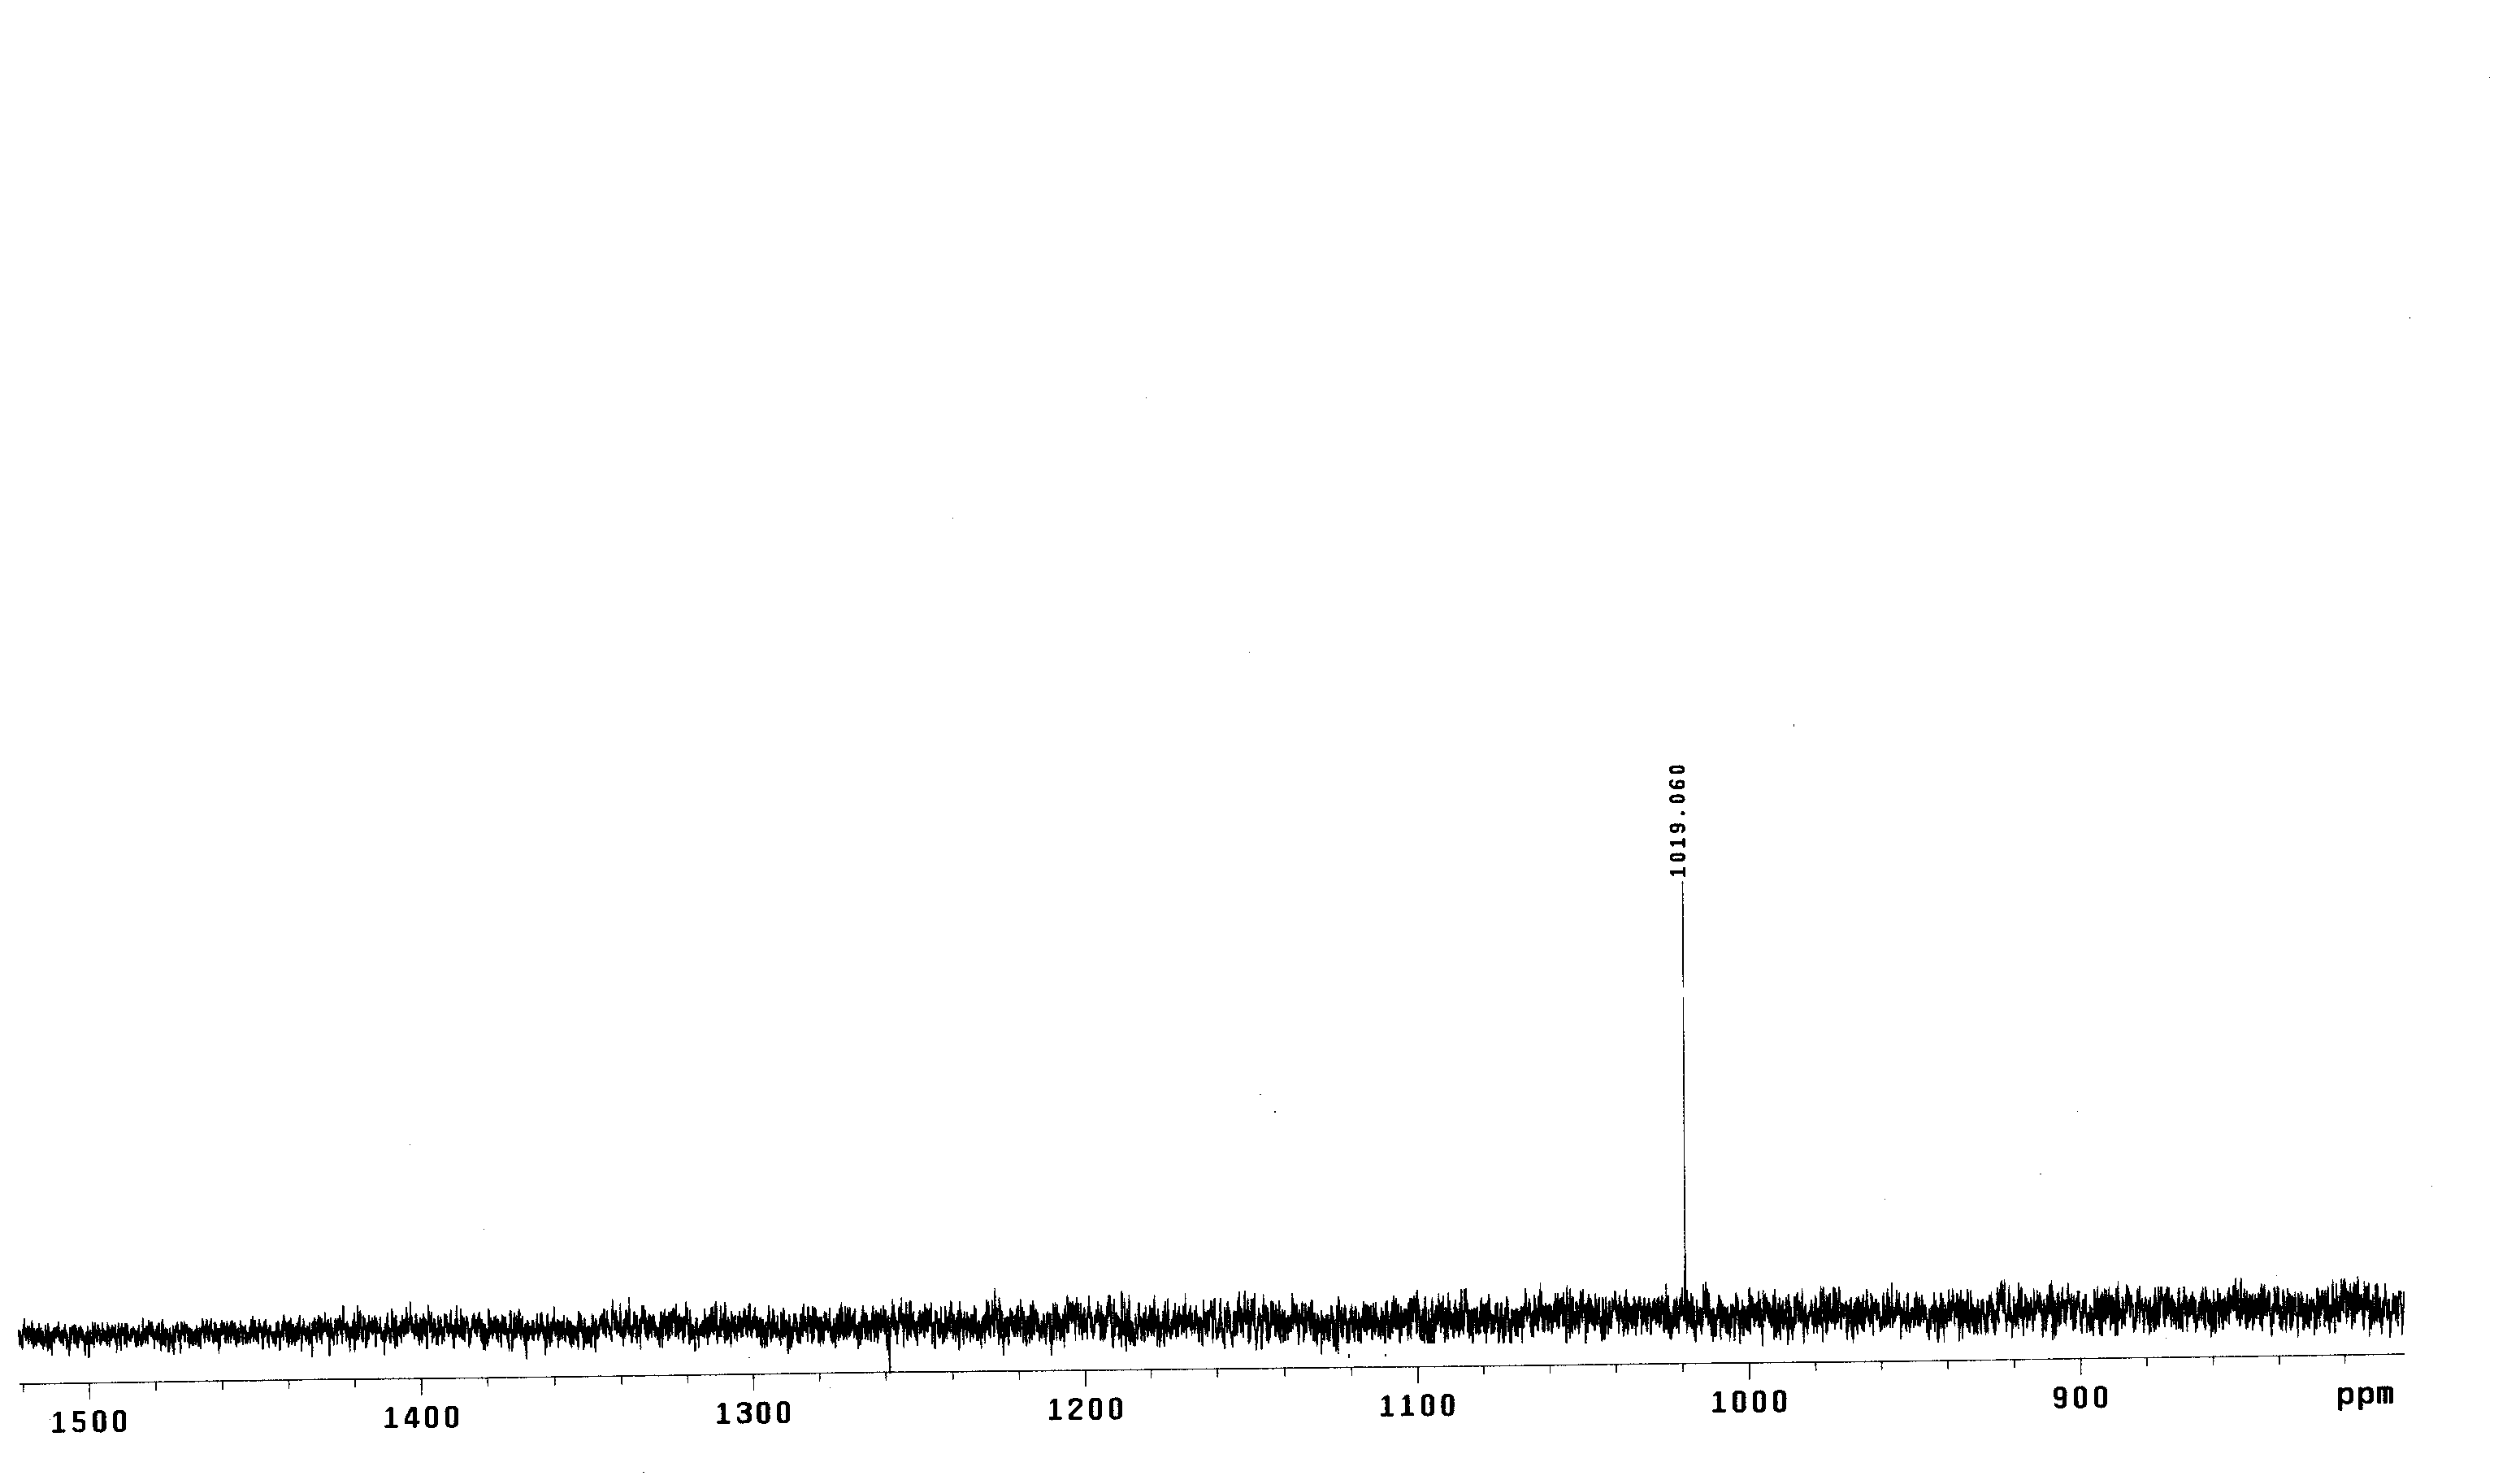


**Figure 1.** 77Se NMR of **14** (CDCl3 solvent)


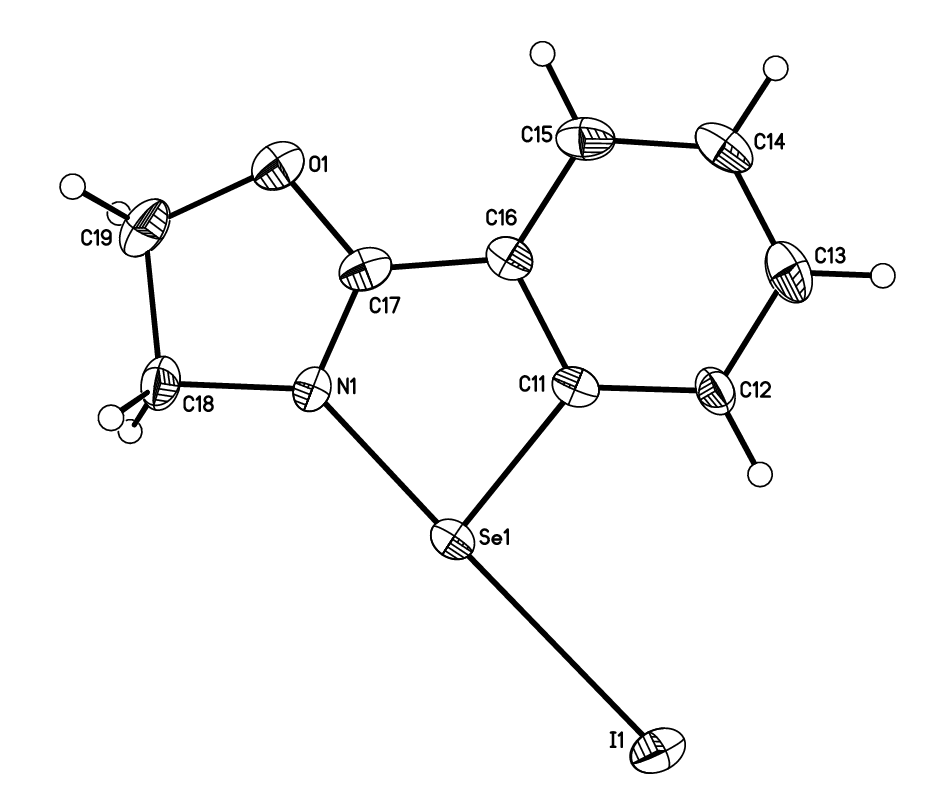


**Figure 2. Molecular Structure of 16**


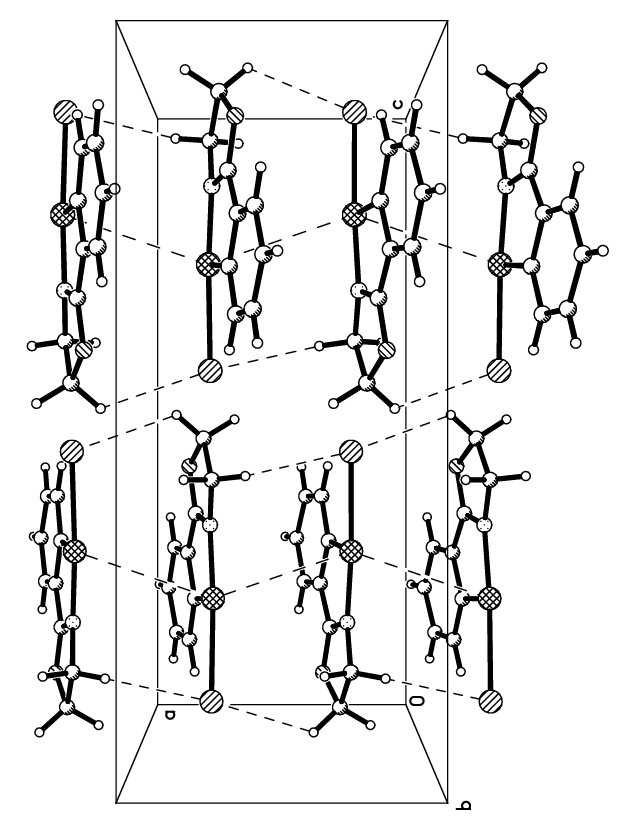


**Figure 3**. Packing diagram of **15**

**
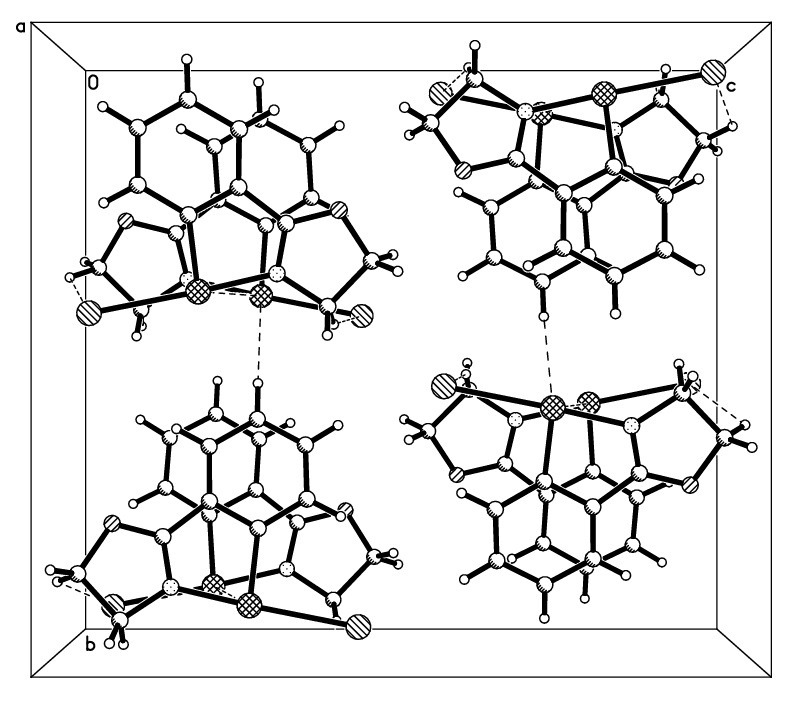
**

**Figure 4**. Packing diagram of **15**
